# Supplementary material
Source: Springer Nature journal article supplement (https://www.springerprofessional.de/resource/supplementary/13638_2010_17_MOESM6_ESM.pdf/11897214)

● - Source Node

○ - Destination Node

● - Cluster Head

○ - Gateway Node

CH & G - Cluster Head & Gateway

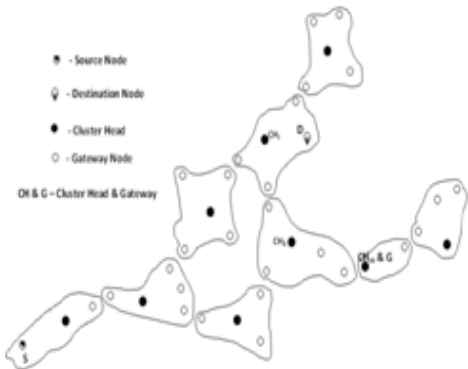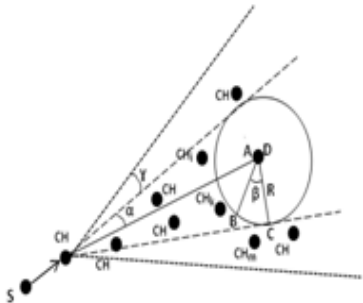

Supplement: MOESM6 [file 11897214]
